# Supplementary material
Source: publisher site journal article supplement (https://www.dovepress.com/article/474636)
Supplement: Supplementary file 1 [file get_supplementary_file.php]

**Supplementary Table 1.** Knowledge.

| Knowledge | **Correctness rate N (%)** |
| --- | --- |
| K1. Common symptoms of Long COVID encompass fatigue, palpitations, chest tightness, joint pain, and diminished attention span. | 479(81.05) |
| K2. Therapeutic interventions for Long COVID primarily target alleviating symptoms and enhancing quality of life. | 464(78.51) |
| K3. Long COVID may manifest in individuals beyond the elderly population. | 551(93.23) |
| K4. Long COVID could potentially result in permanent cardiopulmonary impairment. | 441(74.62) |
| K5. The routine management of individuals with Long COVID involves a healthful diet, regular physical activity, adequate sleep, and psychological support. | 543(91.88) |
| K6. Exercise rehabilitation holds the potential to ameliorate symptoms in patients with Long COVID. | 524(88.66) |
| K7. Psychological interventions play a constructive role in mitigating anxiety and depression symptoms among individuals with Long COVID. | 538(91.03) |
| K8. Regular follow-up appointments are necessary for patients with Long COVID to monitor changes in their condition. | 541(91.54) |
| K9. Exercise rehabilitation is not effective in ameliorating symptoms in patients with Long COVID. | 524(88.66) |

**Supplementary Table 2.** Attitudes.

| **Attitude** | **Strongly agree**  **N (%)** | **Agree**  **N (%)** | **Neutral**  **N (%)** | **Disagree**  **N (%)** | **Strongly disagree**  **N (%)** |
| --- | --- | --- | --- | --- | --- |
| A1. You are willing to actively acquire comprehensive knowledge related to Long COVID. | 165(27.92) | 361(61.08) | 56(9.48) | 8(1.35) | 1(0.17) |
| A2. You are willing to communicate potential symptoms of Long COVID with family and friends. | 125(21.15) | 385(65.14) | 71(12.01) | 10(1.69) | 0 |
| A3. You consider timely medical treatment to be crucial for the management of Long COVID. | 169(28.60) | 354(59.90) | 60(10.15) | 7(1.18) | 1(0.17) |
| A4. You believe that exercise rehabilitation is highly important for alleviating symptoms of Long COVID. | 138(23.35) | 357(60.41) | 73(12.35) | 20(3.38) | 3(0.51) |
| A5. You deem receiving psychological intervention to be highly important for patients with Long COVID. | 140(23.69) | 363(61.42) | 77(13.03) | 9(1.52) | 2(0.34) |
| A6. You are concerned that Long COVID might exert adverse impacts on the overall economy and society. | 95(16.07) | 305(51.61) | 151(25.55) | 36(6.09) | 4(0.68) |
| A7. You acknowledge a responsibility to enhance awareness of Long COVID to better safeguard yourself and others. | 141(23.86) | 391(66.16) | 57(9.64) | 2(0.34) | 0 |

**Supplementary Table 3.** Practices.

| **Practice** | **Very consistent**  **N (%)** | **Somewhat**  **consistent N (%)** | **Neutral**  **N (%)** | **Somewhat**  **inconsistentN (%)** | **Very**  **inconsistent N (%)** |
| --- | --- | --- | --- | --- | --- |
| P1. You acquire knowledge related to Long COVID through channels such as public accounts and short videos. | 200(33.84) | 239(40.44) | 131(22.17) | 17(2.88) | 4(0.68) |
| P2. You engage in discussions with healthcare professionals or acquaintances to exchange insights regarding the prevention and management of Long COVID. | 206(34.86) | 227(38.41) | 134(22.67) | 22(3.72) | 2(0.34) |
| P3. You maintain a consistent regimen of physical exercise and adhere to a nutritious diet to ameliorate the symptoms of Long COVID. | 215(36.38) | 223(37.73) | 134(22.67) | 16(2.71) | 3(0.51) |
| P4. You avail psychological counseling to uphold a positive mindset when coping with Long COVID. | 210(35.53) | 217(36.72) | 139(23.52) | 20(3.38) | 5(0.85) |
| P5. Should you experience symptoms of Long COVID, you promptly seek professional medical support. | 249(42.13) | 228(38.58) | 106(17.94) | 4(0.68) | 4(0.68) |
| P6. You adhere to prescribed medications to alleviate the symptoms of Long COVID. | 260(43.99) | 217(36.72) | 104(17.60) | 9(1.52) | 1(0.17) |
| P7. You routinely monitor your body temperature to promptly identify potential symptoms of Long COVID. | 214(36.21) | 196(33.16) | 145(24.53) | 30(5.08) | 6(1.02) |
| P8. You are attentive to ensuring indoor air circulation. | 320(54.15) | 193(32.66) | 73(12.35) | 4(0.68) | 1(0.17) |
| P9. Even with the comprehensive relaxation of COVID-19 prevention measures, you continue to wear masks in public settings, acknowledging your responsibility for personal health. | 298(50.42) | 192(32.49) | 90(15.23) | 7(1.18) | 4(0.68) |
| P10. You prioritize hand hygiene, regularly employing hand sanitizers or disinfectants to mitigate the risk of COVID-19 infection or improve symptoms of Long COVID. | 302(51.10) | 203(34.35) | 78(13.20) | 7(1.18) | 1(0.17) |
| P11. You make efforts to avoid crowded public places to prevent COVID-19 transmission or exacerbation of Long COVID symptoms. | 275(46.53) | 211(35.70) | 94(15.91) | 8(1.35) | 3(0.51) |
